# Supplementary material for: Prevalence, Antibiogram and Genetic Characterization of Listeria monocytogenes from Food Products in Egypt
Source: MDPI journal article supplement (doi:10.3390/foods10061381), 2021-06-15
Supplement: s1 [file s1]

**Suppl. Table S1.** Biochemical identification of *Listeria monocytogenes* and other *Listeria* species.

|                            |          | <i>L. monocytogenes</i> | <i>L. innocua</i> | <i>L. ivanovii</i> | <i>L. seeligeri</i> | <i>L. welshimeri</i> | <i>L. grayi</i> |
|----------------------------|----------|-------------------------|-------------------|--------------------|---------------------|----------------------|-----------------|
| Carbohydrates fermentation | Dextrose | +                       | +                 | +                  | +                   | +                    | +               |
|                            | Mannitol | –                       | –                 | –                  | –                   | –                    | +               |
|                            | Rhamnose | +                       | +/-               | –                  | –                   | +/-                  | +/-             |
|                            | Xylose   | –                       | –                 | +                  | +                   | +                    | –               |
| B-hemolysis                |          | +                       | –                 | +                  | +                   | –                    | –               |
| Catalase                   |          | +                       | +                 | +                  | +                   | +                    | +               |
| Oxidase                    |          | –                       | –                 | –                  | –                   | –                    | –               |
| CAMP test                  |          | +                       | –                 | –                  | –                   | –                    | –               |

**Supplementary Table S2.** Antimicrobial resistance profiles of *Listeria monocytogenes* isolates from food products.

| Sample ID | Source                         | $\beta$ -lactams                  |                |                      |                |                      |                | Fluoroquinolones     |                |                      |                |                      |                |                      |                |                      |                |
|-----------|--------------------------------|-----------------------------------|----------------|----------------------|----------------|----------------------|----------------|----------------------|----------------|----------------------|----------------|----------------------|----------------|----------------------|----------------|----------------------|----------------|
|           |                                | Amoxicillin-Clavulanic acid (AMC) |                | Cefotaxime (CTX)     |                | Amoxicillin (AX)     |                | Norfloxacin (NOR)    |                | Ciprofloxacin (CIP)  |                | Levofloxacin (LEV)   |                | Danofloxacin (DA)    |                | Nalidixic acid (NA)  |                |
|           |                                | Inhibitory zone (mm)              | Interpretation | Inhibitory zone (mm) | Interpretation | Inhibitory zone (mm) | Interpretation | Inhibitory zone (mm) | Interpretation | Inhibitory zone (mm) | Interpretation | Inhibitory zone (mm) | Interpretation | Inhibitory zone (mm) | Interpretation | Inhibitory zone (mm) | Interpretation |
| 1         | Milk                           | 2.5                               | 0              | 0.2                  | 0              | 0.5                  | 0              | 1.7                  | 1              | 0.2                  | 0              | 0.2                  | 0              | 1.2                  | (+, -)         | 1.1                  | (+, -)         |
| 2         | Milk                           | 2.3                               | 1              | 0.4                  | 0              | 1.9                  | 1              | 1.7                  | 1              | 2                    | 1              | 2.5                  | 1              | 0.7                  | 0              | 1.4                  | (+, -)         |
| 3         | Milk                           | 2.5                               | 1              | 2.2                  | 1              | 2.1                  | 1              | .5                   | 0              | 2                    | 1              | 1.4                  | (+, -)         | 0.6                  | 0              | 1.4                  | (+, -)         |
| 4         | Fish fillet                    | 2.3                               | 1              | 1.9                  | 1              | 1.9                  | 1              | 1.9                  | 1              | 2                    | 1              | 0.5                  | 0              | 2.3                  | 1              | 2.2                  | 1              |
| 5         | Fish fillet                    | 2.5                               | 0              | 1.9                  | 1              | 1.9                  | 1              | 2                    | 1              | 1.5                  | (+, -)         | 2.5                  | 1              | 0                    | 0              | 0.3                  | 0              |
| 6         | Fish fillet                    | 2.3                               | 1              | 0                    | 0              | 2.3                  | 1              | 1.2                  | (+, -)         | 0.8                  | 0              | 2                    | 1              | 2.4                  | 1              | 1.2                  | (+, -)         |
| 7         | Fish fillet                    | 0                                 | 1              | 1.4                  | (+, -)         | 0.2                  | 0              | 2.4                  | 1              | 2                    | 1              | 0.2                  | 0              | 0                    | 0              | 2.4                  | 1              |
| 8         | Minced meat                    | 0.4                               | (+, -)         | 2.2                  | 1              | 0                    | 0              | 2.4                  | 1              | 1.4                  | (+, -)         | 2.2                  | 1              | 0                    | 0              | 1.2                  | (+, -)         |
| 9         | Minced meat                    | 2.4                               | 0              | 2.2                  | 1              | 2                    | 1              | 2.3                  | 1              | 0.2                  | 0              | 2.4                  | 1              | 2.3                  | 1              | 1.4                  | (+, -)         |
| 10        | Minced meat                    | 0                                 | 1              | 2.1                  | 1              | 1.5                  | (+, -)         | 2.6                  | 1              | 1.8                  | 1              | 0.2                  | 0              | 0.5                  | 0              | 0                    | 0              |
| 11        | Minced meat                    | 2.4                               | 1              | 2                    | 1              | 2.5                  | 1              | 2.5                  | 1              | 2.2                  | 1              | 2.2                  | 1              | 0.3                  | 0              | 2.4                  | 1              |
| 12        | Minced meat                    | 2.5                               | 1              | 1.1                  | (+, -)         | 1.9                  | 1              | 2.5                  | 1              | 2                    | 1              | 0.3                  | 0              | 2.5                  | 1              | 1.2                  | (+, -)         |
| 13        | Minced meat                    | 2.5                               | 1              | 1.7                  | 1              | 0                    | 0              | 2.1                  | 1              | 2.3                  | 1              | 2.5                  | 1              | 2.1                  | 1              | 0.5                  | 0              |
| 14        | Minced meat                    | 2.4                               | 1              | 1.8                  | 1              | 2.3                  | 1              | 2.3                  | 1              | 2.2                  | 1              | 2.4                  | 1              | 2.1                  | 1              | 2.3                  | 1              |
| 15        | Sausage                        | 2.4                               | 1              | 1.9                  | 1              | 2.2                  | 1              | 2.3                  | 1              | 0                    | 0              | 0                    | 0              | 1.6                  | (+, -)         | 1.5                  | (+, -)         |
| 16        | Sausage                        | 2.5                               | 1              | 1.8                  | 1              | 0.3                  | 0              | 0.3                  | 0              | 0.3                  | 0              | 1.2                  | (+, -)         | 2.6                  | 1              | 1.5                  | (+, -)         |
| 17        | Sausage                        | 2.6                               | 1              | 2.1                  | 1              | 2                    | 1              | 2.3                  | 1              | 2.2                  | 1              | 0.3                  | 0              | 2.4                  | 1              | 1.3                  | (+, -)         |
| Control   | <i>L. monocytogenes</i> LMEGY1 | 2.9                               | 1              | 2.5                  | 1              | 2.6                  | 1              | 2.4                  | 1              | 2.4                  | 1              | 2.4                  | 1              | 2.2                  | 1              | 2                    | 1              |

Note: 1 = Sensitive; 0 = Resistant; (+, -) = Intermediate

Continued

| Sample ID | Source                         | Aminoglycosides      |                |                      |                | Macrolides           |                |                      |                | Tetracycline         |                |                      |                | Chloramphenicol      |                | Sulfonamides                        |                | Glycopeptides        |                |
|-----------|--------------------------------|----------------------|----------------|----------------------|----------------|----------------------|----------------|----------------------|----------------|----------------------|----------------|----------------------|----------------|----------------------|----------------|-------------------------------------|----------------|----------------------|----------------|
|           |                                | Amikacin (AK)        |                | Gentamicin (CN)      |                | Erythromycin (E)     |                | Azithromycin (AZM)   |                | Doxycycline (DO)     |                | Oxytetracycline (T)  |                | Chloramphenicol (C)  |                | Trimethoprim-Sulfamethoxazole (SXT) |                | Vancomycin (VA)      |                |
|           |                                | Inhibitory zone (mm) | Interpretation | Inhibitory zone (mm)                | Interpretation | Inhibitory zone (mm) | Interpretation |
| 1         | Milk                           | 1.9                  | 1              | 1.8                  | 1              | 2.2                  | 1              | 1.3                  | (+, -)         | 0.2                  | 0              | 0.2                  | 0              | 1.1                  | 0              | 0.3                                 | 0              | 2                    | 1              |
| 2         | Milk                           | 2                    | 1              | 1.9                  | 1              | 2.8                  | 1              | 2                    | 1              | 0.3                  | 0              | 0.5                  | 0              | 1                    | 0              | 0.3                                 | 0              | 2                    | 1              |
| 3         | Milk                           | 1.5                  | (+, -)         | 2                    | 1              | 1.3                  | (+, -)         | 2.2                  | 1              | 3                    | 1              | 2.5                  | 1              | 1.7                  | (+, -)         | 0                                   | 0              | 0.4                  | 0              |
| 4         | Fish fillet                    | 1.9                  | 1              | 0.2                  | 0              | 3                    | 1              | 0.2                  | 0              | 3                    | 1              | 1.4                  | (+, -)         | 2.7                  | 1              | 3                                   | 1              | 2                    | 1              |
| 5         | Fish fillet                    | 1                    | 0              | 1.2                  | (+, -)         | 2.8                  | 1              | 0.2                  | 0              | 1.3                  | (+, -)         | 0.2                  | 0              | 2.5                  | 1              | 0.5                                 | 0              | 2                    | 1              |
| 6         | Fish fillet                    | 0.5                  | 0              | 1.8                  | 1              | 0.5                  | 0              | 0                    | 0              | 0.2                  | 0              | 0.2                  | 0              | 0.3                  | 0              | 3                                   | 1              | 2                    | 1              |
| 7         | Fish fillet                    | 2.4                  | 1              | 2                    | 1              | 2.5                  | 1              | 1.4                  | (+, -)         | 0.4                  | 0              | 0.4                  | 0              | 0.4                  | 0              | 0.2                                 | 0              | 1.7                  | (+, -)         |
| 8         | Minced meat                    | 2.1                  | 1              | 0.7                  | 0              | 0.6                  | 0              | 1.4                  | (+, -)         | 2.4                  | 1              | 2.3                  | 1              | 0.2                  | 0              | 0.2                                 | 0              | 2.1                  | 1              |
| 9         | Minced meat                    | 0.8                  | 0              | 2                    | 1              | 2.2                  | 1              | 0.2                  | 0              | 0                    | 0              | 0                    | 0              | 0.2                  | 0              | 0.2                                 | 0              | 0.2                  | 0              |
| 10        | Minced meat                    | 2.4                  | 1              | 0.4                  | 0              | 2.5                  | 1              | 0                    | 0              | 1.6                  | (+, -)         | 2.5                  | 1              | 0                    | 0              | 1.4                                 | (+, -)         | 2                    | 1              |
| 11        | Minced meat                    | 1.9                  | 1              | 2                    | 1              | 0.5                  | 0              | 1.4                  | (+, -)         | 0.2                  | 0              | 0.2                  | 0              | 0.4                  | 0              | 0.2                                 | 0              | 2                    | 0              |
| 12        | Minced meat                    | 1.9                  | 1              | 1.5                  | (+, -)         | 2.8                  | 1              | 1.2                  | (+, -)         | 0                    | 0              | 0.2                  | 0              | 2.5                  | 1              | 0                                   | 0              | 2                    | 1              |
| 13        | Minced meat                    | 2.1                  | 1              | 2.1                  | 1              | 3                    | 1              | 0.7                  | 0              | 1.4                  | (+, -)         | 0                    | 0              | 0.2                  | 0              | 0.7                                 | 0              | 1.4                  | (+, -)         |
| 14        | Minced meat                    | 2                    | 1              | 2                    | 1              | 0                    | 0              | 1.2                  | (+, -)         | 0.5                  | 0              | 0                    | 0              | 0                    | 0              | 0.5                                 | 0              | 2.3                  | 1              |
| 15        | Sausage                        | 0.3                  | 0              | 0.2                  | 0              | 2.6                  | 1              | 2.4                  | 1              | 0.5                  | 0              | 0.6                  | 0              | 0.2                  | 0              | 1.4                                 | (+, -)         | 0.5                  | 0              |
| 16        | Sausage                        | 0                    | 0              | 0                    | 0              | 0.4                  | 0              | 0.4                  | 0              | 0                    | 0              | 0.7                  | 0              | 0.6                  | 0              | 0                                   | 0              | 2.3                  | 1              |
| 17        | Sausage                        | 2.2                  | 1              | 2                    | 1              | 2.8                  | 1              | 1.3                  | (+, -)         | 0.3                  | 0              | 0.2                  | 0              | 1.4                  | (+, -)         | 0.2                                 | 0              | 0.4                  | 0              |
| Control   | <i>L. monocytogenes</i> LMEGY1 | 2.8                  | 1              | 2.5                  | 1              | 2.9                  | 1              | 2.7                  | 1              | 1                    | 0              | 1.1                  | 0              | 1.1                  | 0              | 1.5                                 | 0              | 2.4                  | 1              |

Note: 1 = Sensitive; 0 = Resistant; (+, -) = Intermediate
